# Supplementary material
Source: publisher figshare collection journal article supplement (https://gsajournals.figshare.com/ndownloader/files/12114689)
Supplement: Supplementary file 1 [file 12114689]

## Sheet: Sheet1
Table S2. Oligonucleotides used in this study for cloning purposes
Oligonucleotides	Sequence
pGEM ap1σ-(5xGA)GFP::AFpyrG / pGEM ap1σ-(5xGA)mRFP::AFpyrG
ap1σ 5’ ApaI F	CGCGGGGCCCCATTTCTAGGGATGTGGCTGCAGG
ap1σ 3’ ORF XbaI NS R	CGCGTCTAGACATGATCTTCGTAACCACATCTTCCTC
ap1σ 3’ XbaI F	CGCGTCTAGAGAGCGTCATCAGTGATACGCTTC
ap1σ 3‘ NotI R	CGCGGCGGCCGCGGGCGTGAGGATACCATCATCGAATG
5xGA XbaI F	CGCGTCTAGAGGAGCTGGTGCAGGCGCTGGAGCCGGTGCC
AFpyrG XbaI R	CGCGTCTAGAACTGTCTGAGAGGAGGCACTGATGCG
pBS SKII claH-(5xGA)GFP::AFpyrG
claH ORF KpnI F	CGCGGGTACCCTGGACCAGCTCGCAGAACTTGAAG
claH ORF NS SpeI R	CGCGACTAGTGAAAGGACGGAACCCCGTGGCCTG
claH 3’ SpeI F	CGCGACTAGTGCTCGCCTTGTCTTTTTGAGGGGTAG
claH 3’ NotI R	CGCGGCGGCCGCGGACAATCAGATTGACAGGGAGGG
5xGA SpeI F	CGCGACTAGTGGAGCTGGTGCAGGCGCTGGAGCCGGTGCC
AFpyrG SpeI R	CGCGACTAGTACTGTCTGAGAGGAGGCACTGATGCG
pGEM thiAp::ap1μ::AFriboB
ap1μ 5’ ApaI F	CGCGGGGCCCGATACGAGCGTTCAGGACCGCTTC
ap1μ 5’ SpeI R	CGCGACTAGTGCACTTGCCACAACTCCAGTATTC
ap1μ ORF SpeI F	CGCGACTAGTATGGCATCGGCGGTTTTCTTCCTAG
ap1μ ORF NotI R	CGCGGCGGCCGCCAGTTCTGCGCGCATAAGAAACTC
AFriboB SpeI R	CCGGACTAGTCCCGGGCTGCAGGAATTCGATAAG
thiAp SpeI R	CGCGACTAGTGTTGACTCAGTTCAATGGTTCGAC
pGEM thiAp::ap1β::AFriboB
ap1β 5’ ApaI F	CGCGGGGCCCCCAAGGCCGATTCGAACCGAGC
ap1β 5’ SpeI R	CGCGACTAGTGCCCCTACTAGCTCTTCAGTCATAC
ap1β ORF SpeI F	CGCGACTAGTATGGATTGTTGTGGACAGGGGAAG
ap1β ORF NotI R	CGCGGCGGCCGCCACCAGAGAACACTCGGAATACC
AFriboB SpeI R	CCGGACTAGTCCCGGGCTGCAGGAATTCGATAAG
thiAp SpeI R	CGCGACTAGTGTTGACTCAGTTCAATGGTTCGAC
pGEM thiAp::rabE::AFriboB
rabE 5’ ApaI F	CGCGGGGCCCGAGTGCGGAATATGCCTCCACCTG
rabE 5’ SpeI R	CGCGACTAGTAGCGAACAGTTAGATACACCGAGGG
rabE ORF SpeI F	CGCGACTAGTATGGCTAACGACGAGTATGATGTGAG
rabE 3’ NotI R	CGCGGCGGCCGCGCTAACGGCTGAGCTAGGTTACTG
AFriboB SpeI R	CCGGACTAGTCCCGGGCTGCAGGAATTCGATAAG
thiAp SpeI R	CGCGACTAGTGTTGACTCAGTTCAATGGTTCGAC
pGEM thiAp::rabC::AFriboB
rabC 5’ ApaI F	CGCGGGGCCCCAACGGTTATGGACGAAGTATGCGG
rabC 5’ XbaI R	CGCGTCTAGAGGGGACAAGAGGTCAAATGTAAAGTC
rabC ORF XbaI F	CGCGTCTAGAATGGCTTCAGCATCAACGGCCGGG
rabC 3’ NotI R	CGCGGCGGCCGCGGGTAGTTGAGCTCAACGCATCG
AFriboB XbaI R	CCGGTCTAGACCCGGGCTGCAGGAATTCGATAAG
thiAp XbaI R	CGCGTCTAGAGTTGACTCAGTTCAATGGTTCGAC
pGEM uncA::AFriboB
uncA 5’ ApaI F	CGCGGGGCCCCCGGCATAAGCTCTTCCTGCTATG
uncA 5’ SpeI R	CGCGACTAGTGGAGCGGACAACAAATTGCGCACG
uncA 3’ SpeI F	CGCGACTAGTCGCCGATGAAGATCTACACTGGAATG
uncA 3’ NotI R	CGCGGCGGCCGCCTGGTGCTGAAGTCGTCTGTCGTC
AFriboB SpeI F	CCGGACTAGTAAGCTTGATATCACAATCAGCTTTTC
AFriboB SpeI R	CCGGACTAGTCCCGGGCTGCAGGAATTCGATAAG
pGEM GFP-rabE::AFpyrG
rabE 5’ ApaI F	CGCGGGGCCCGAGTGCGGAATATGCCTCCACCTG
rabE 5’ SpeI R	CGCGACTAGTAGCGAACAGTTAGATACACCGAGGG
rabE ORF SpeI F	CGCGACTAGTATGGCTAACGACGAGTATGATGTGAG
rabE ORF SpeI R	CGCGACTAGTTTAACAGCATCCACCCTTGTTCTCGG
rabE 3’ SpeI F	CGCGACTAGTCGTCAACAACGATTTGCGGTTCTG
rabE 3’ NotI R2	CGCGGCGGCCGCCTGTCCAGACCAAAGACCTCCGG
sGFP XbaI F	CGCGTCTAGAatggtgagcaagggcgaggag
sGFP SpeI NS R	CGCGACTAGTcttgtacagctcgtccatgcc
AFpyrG SpeI F	CGCGACTAGTGCCTCAAACAATGCTCTTCACCCTC
AFpyrG XbaI R	CGCGTCTAGAACTGTCTGAGAGGAGGCACTGATGCG
pBS SKII ap1β-argB
ap1β 5’ BamHI F	CGCGGGATCCCCATACGATACACCCAAGGCGAAG
ap1β 3’ NotI R	CGCGGCGGCCGCCCATTGGCGGCTTCAGACACCAC
argB PstI F	CGCGCTGCAGGCTTTATTTCGCGGTTTTTTGGGG
argB PstI R	CGCGCTGCAGGTCGACCTACAGCCATTGCG
Mutagenesis oligos
ap1β 632DID634/A F	CAATGTGGAGAACCTTCTGGCGGCCGCTTTCGATGGCACTGCGCCTGC
ap1β 632DID634/A R	GCAGGCGCAGTGCCATCGAAAGCGGCCGCCAGAAGGTTCTCCACATTG
ap1β 709NGF711/A F	GTGCGGGCGCTGACCTTCTCGCGGCCGCTTCTGGGTTGGATCTTTCCGGC
ap1β 709NGF711/A R	GCCGGAAAGATCCAACCCAGAAGCGGCCGCGAGAAGGTCAGCGCCCGCAC
ap1σ-(5xGA)GFP::AFpyrG, claH-(5xGA)GFP::AFpyrG and ap1σ-(5xGA)mRFP::AFpyrG constructs carry a 5 x Gly-Ala (5xGA) linker, amplified together with GFP or mRFP and AFpyrG from plasmids p1439, or p1491 respectively (Szewczyk et al. 2006).
